# Supplementary material for: Silver nanofibers from the nanorods of one-dimensional organometallic coordination polymers
Source: Royal Society of Chemistry journal article supplement (doi:10.1039/c002740e), 2010-01-01
Supplement: c002740e.pdf [file c002740e.pdf]

## **Supporting Information for MS:**

### **Silver Nanofibers from Nanorods of One-dimensional Organometallic Coordination Polymer**

**Kamran Akhbari, Ali Morsali \***

Department of Chemistry, Faculty of Sciences, Tarbiat Modares University, P.O. Box  
14155-4838, Tehran, Islamic Republic of Iran

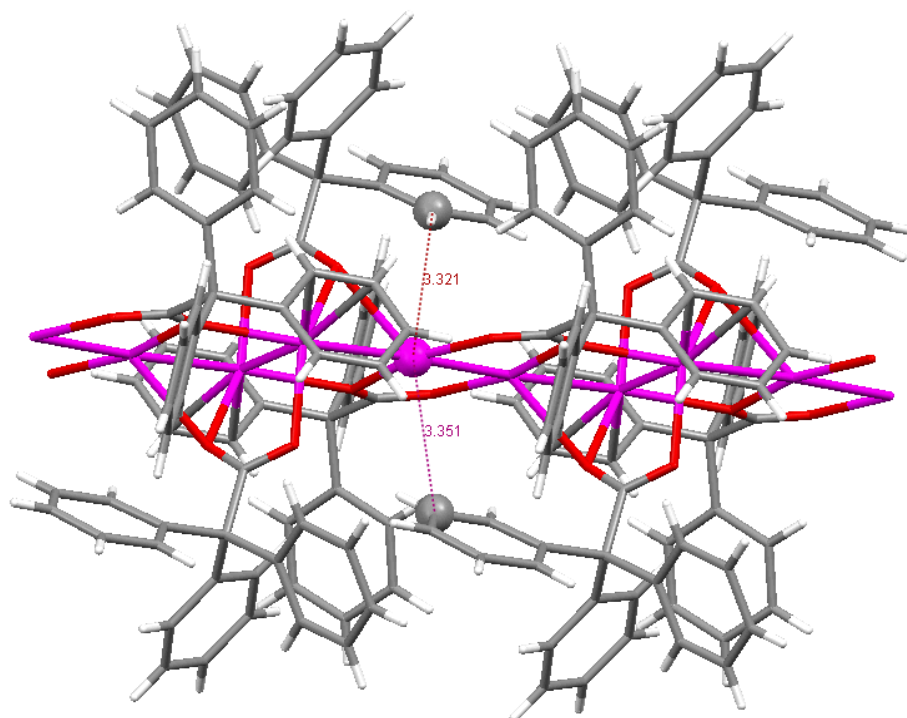

**Figure S1.** A fragment of compound **1** CP, showing two  $\eta^1$  Ag1...C interactions (Ag = violet, O = red, C = gray).

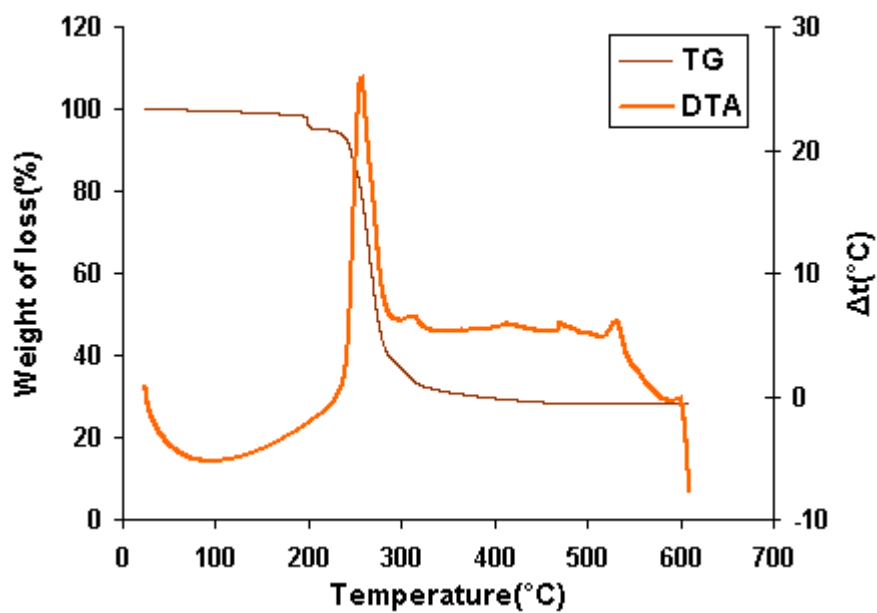

Figure S2. Thermal behaviors of compound 1 single crystals.

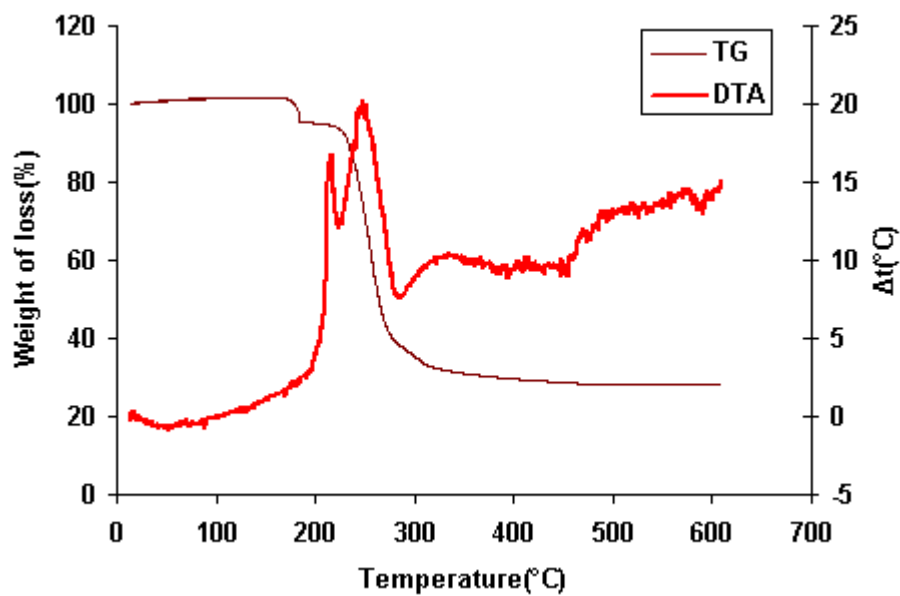

Figure S3. Thermal behaviors of compound 1 nanorods.

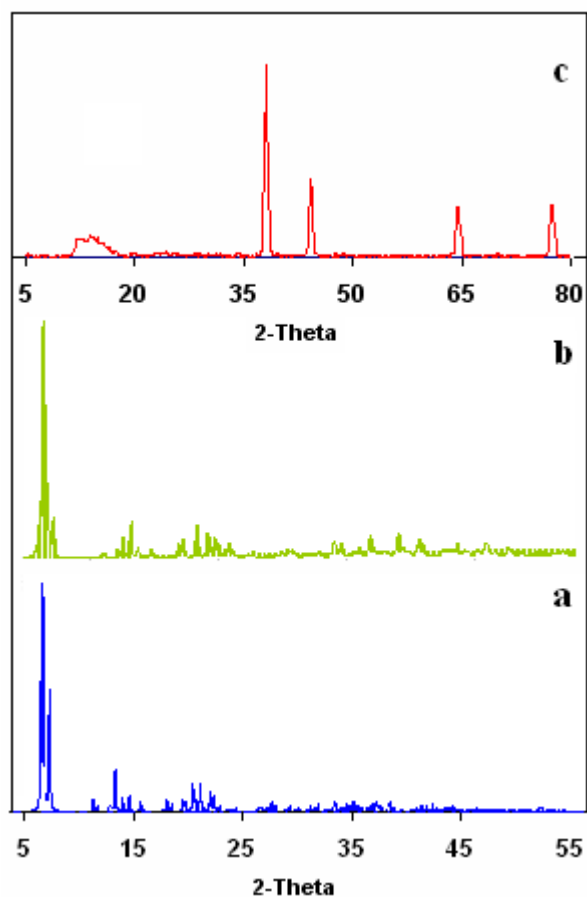

**Figure S4.** XRD patterns; a) simulated pattern based on single crystal data, b) nanorods of compound **1**, c) silver nanofibers prepared from compound **1** nanorods.

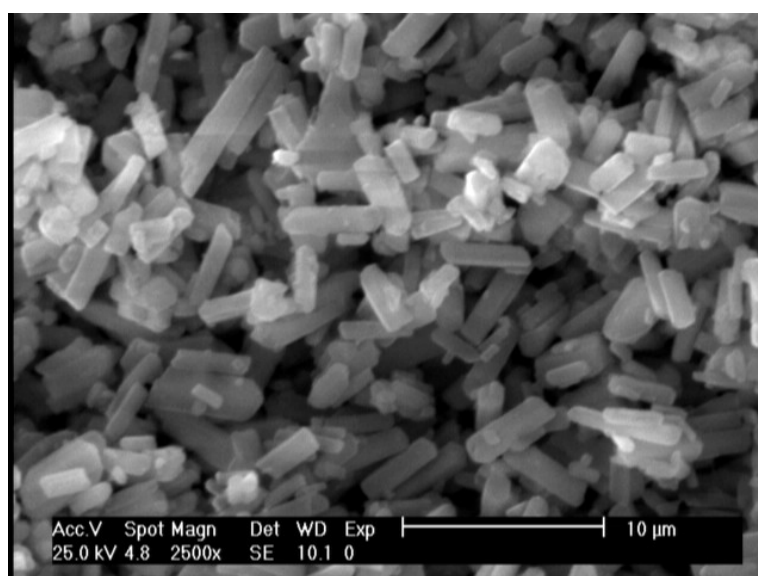

**Figure S5.** SEM image of compound **1** nanorods.
